# Supplementary material for: Ultrahigh-capacity and dendrite-free lithium metal anodes enabled by lithiophilic bimetallic oxides
Source: Royal Society of Chemistry journal article supplement (doi:10.1039/d2ta06841a), 2022-01-01
Supplement: d2ta06841a3.pdf [file d2ta06841a3.pdf]

## Supporting Information

### Ultrahigh-Capacity and Dendrite-free Lithium Metal Anodes enabled by Lithiophilic Bimetallic Oxides

Yang Yang,<sup>a#</sup> Jiaqi Cao,<sup>a#</sup> Wangyang Li,<sup>a#</sup> Qiaoli Zhang,<sup>a</sup> Yonghui Xie,<sup>a</sup> Yunda  
Lai,<sup>a</sup> Shuying Cheng,<sup>a, b, c</sup> Baihua Qu,<sup>d</sup> Dong-Liang Peng,<sup>e</sup> Xinghui Wang<sup>a, b, c, f\*</sup>

<sup>a</sup> College of Physics and Information Engineering, Institute of Micro-Nano Devices and  
Solar Cells, Fuzhou University, Fuzhou, 350108, China.

<sup>b</sup> Fujian Science & Technology Innovation Laboratory for Optoelectronic Information  
of China, Fuzhou, Fujian 350108, China.

<sup>c</sup> Jiangsu Collaborative Innovation Center of Photovoltaic Science and Engineering,  
Changzhou, 213000, China.

<sup>d</sup> College of Materials Science and Engineering, Chongqing University, Chongqing,  
400044, PR China.

<sup>e</sup> College of Materials, Xiamen University, Xiamen, 361005, PR China.

<sup>f</sup> Fujian Key Laboratory of Electrochemical Energy Storage Materials, Fuzhou  
University, Fuzhou, Fujian 350002, China.

\*Corresponding author: seaphy23@fzu.edu.cn.

# These authors contributed equally to this work.

## 20 1. Experimental Section

### 21 1.1. Material Synthesis

22 **Synthesis of ZMO@CC:** The commercial carbon cloths ( $4 \times 4$  cm) were treated with  
23 concentrated  $\text{HNO}_3$  before use. The CC was immersed in a Teflon-lined stainless  
24 autoclave with a precursor solution (40 ml) that contained  $\text{ZnSO}_4 \cdot 7\text{H}_2\text{O}$  (0.25 mmol)  
25 and  $\text{KMnO}_4$  (0.5 mmol). After hydrothermally treated at  $160^\circ\text{C}$  for 24 h, the CC sample  
26 was cleaned with DI water and then annealed in air at  $300^\circ\text{C}$  for 2 h to obtain the  
27 ZMO@CC.

28 **Synthesis of ZCO@CC:** The hydrothermally treated process was similar to the previous  
29 work[43]. The CC was immersed in a Teflon-lined stainless autoclave with a precursor  
30 solution (50 ml) that contained  $\text{Zn}(\text{NO}_3)_2 \cdot 6\text{H}_2\text{O}$  (1 mmol),  $\text{Co}(\text{NO}_3)_2 \cdot 6\text{H}_2\text{O}$  (2 mmol),  
31  $\text{NH}_4\text{F}$  (2 mmol), and  $\text{CO}(\text{NH}_2)_2$  (5 mmol). After hydrothermally treated at  $120^\circ\text{C}$  for  
32 10 h, the CC sample was cleaned with DI water and then annealed in air at  $300^\circ\text{C}$  for  
33 2 h to obtain the ZCO@CC.

34 **Synthesis of NCO@CC:** The hydrothermally treated process was similar to the previous  
35 work[44]. The CC was immersed in a Teflon-lined stainless autoclave with a precursor  
36 solution (50 ml) that contained  $\text{Ni}(\text{NO}_3)_2 \cdot 6\text{H}_2\text{O}$  (1 mmol), and  $\text{Co}(\text{NO}_3)_2 \cdot 6\text{H}_2\text{O}$  (2  
37 mmol),  $\text{CO}(\text{NH}_2)_2$  (8 mmol). After hydrothermally treated at  $120^\circ\text{C}$  for 10 h, the CC  
38 sample was cleaned with DI water and then annealed in air at  $350^\circ\text{C}$  for 2 h to obtain  
39 the NCO@CC.

40 **Synthesis of  $\text{MnO}_2$ @CC:** The CC was immersed in a Teflon-lined stainless autoclave  
41 with a precursor solution (50 ml) that contained  $\text{KMnO}_4$  (0.5 mmol). After  
42 hydrothermally treated at  $160^\circ\text{C}$  for 24 h, the CC sample was cleaned with DI water  
43 and then annealed in air at  $300^\circ\text{C}$  for 2 h to obtain the  $\text{MnO}_2$ @CC.

44 **Synthesis of ZnO@CC[45]:** To obtain the ZnO@CC, a simple annealing treatment was  
45 employed.  $\text{Zn}(\text{NO}_3)_2 \cdot 6\text{H}_2\text{O}$  was dissolved in DI water with a concentration of 100 mg

46 mL<sup>-1</sup>. After being immersed in Zn(NO<sub>3</sub>)<sub>2</sub> solution for 10 min, the CC was taken out and  
47 calcined in a tube furnace (BEQ, BTF 1200C) at 500 °C for 10 min in argon, and then  
48 the ZnO@CC was obtained.

49 ***Fabrication of Composite Li Anodes (Li-ZMO@CC, Li-ZCO@CC, Li-NCO@CC, Li-***  
50 ***MnO<sub>2</sub>@CC, and Li-ZnO@CC)***

51 Firstly, the as-fabricated samples were cut into disks with a diameter of 12 mm.  
52 The molten infusion process was carried out in an argon-filled glove box. The Li foils  
53 were molten in a stainless-steel container at 300 °C. Subsequently, the Li-ZMO@CC,  
54 Li-ZCO@CC, Li-NCO@CC, Li-MnO<sub>2</sub>@CC, and Li-ZnO@CC were obtained by  
55 directly contacting molten Li with ZMO@CC, ZCO@CC, NCO@CC, MnO<sub>2</sub>@CC, and  
56 ZnO@CC, respectively.

57 **1.2. Electrochemical Measurements**

58 Symmetric cells were employed to investigate the electrochemical cycling  
59 performance and assembled in an argon-filled glove box. CR2032-type coin cells were  
60 used for assembling the symmetric cell with two identical electrodes (Li foil or the as-  
61 fabricated composite Li Anodes). The electrolyte was ether-based electrolyte, including  
62 a mixture of 1M lithium salt (LiTFSI) dissolved in 1,3-dioxolane (DOL) and 1,2-  
63 dimethoxyethane (DME) (v/v=1:1) with 1% LiNO<sub>3</sub>, while the separator was Celgard  
64 2400. The amount of electrolyte employed for each cell was 40 μL. The electrochemical  
65 cycling performance were conducted on the Neware multichannel battery tester (CT-  
66 4008). Electrochemical impedance spectroscopy (EIS) measurements were tested on a  
67 Bio-Logic VSP multichannel electrochemical workstation with 0.01 Hz to 100 kHz.

68 For full cell, the LiFePO<sub>4</sub> (LFP) cathodes (active mass loading: 3.5 mg cm<sup>-2</sup>) were  
69 prepared by blade-casting the mixed slurry containing LFP powder, carbon black, and  
70 polyvinylidene fluoride (mass ratio of 8:1:1) onto the aluminum foil, following a  
71 vacuum drying process at 120 °C for overnight. The pouch cell with size of 4 × 2 cm<sup>2</sup>

72 was assembled in the glove box by pairing composite Li anode and LFP cathode (active  
73 mass loading: 16 mg).

### 74 **1.3. Materials characterization**

75 A scanning electron microscope (SEM, Helios G4 CX, FEI) equipped with an  
76 energy dispersive X-ray spectrometer (EDX) was employed to observe the morphology  
77 and chemical element distribution of the samples. The XRD patterns were measured by  
78 Rigaku SmartLab (Cu K $\alpha$  radiation, 40 kV, 30 mA). To avoid air pollution of Li, the  
79 electrode after Li infusion was encapsulated in CR2032 case (Shenzhen Kejing) with  
80 one side Kapton window before the XRD analysis. XPS analysis was explored by an  
81 X-ray photoelectron spectrometer (Thermo Scientific K-Alpha, Al K $\alpha$  radiation). TEM  
82 and SAED were performed on a field emission transmission electron microscope (JEOL  
83 JEM-2100F).

### 84 **1.4. Operando Optical Testing**

85 The optical microscopy videos were taken with a 6XB-PC Shanghai Guangxue  
86 microscope at 10X with a plan objective. A sealed electrochemical pool (STC-Q  
87 Shenzhen Kejing) using ether-based electrolyte was used for visualization in-situ  
88 morphology studies. The electrochemical measurements during the in-situ processes  
89 were carried out on a Bio-Logic VSP multichannel electrochemical workstation.

### 90 **1.5. Theoretical calculations**

91 Theoretical calculations were performed using the Vienna Ab Initio Simulation  
92 Package (VASP) with the ionization potentials, including the effect of core electrons,  
93 being described by the projector augmented wave (PAW) method [46, 47]. In this work,  
94 the Perdew–Burke–Ernzerhof (PBE) GGA exchange–correlation functionals were  
95 used to relax the structures of compounds of interest, which can be obtained from  
96 material projects, such as ZnMn<sub>2</sub>O<sub>4</sub>(mp-18751), ZnCo<sub>2</sub>O<sub>4</sub>(mp-753489), NiCo<sub>2</sub>O<sub>4</sub>(mp-

97 1096547), MnO<sub>2</sub>(mp-510408), ZnO(mp-2133), Li(mp-51), Mn(mp-35), LiZn(mp-  
98 1934), Li<sub>2</sub>O(mp-1960), Ni(mp-23), Co(mp-102). A plane-wave energy cutoff of 500  
99 eV is used in all calculations. For the geometric relaxation of the structures, a  
100 summation over the Brillouin Zone (BZ) was performed with the Monkhorst–Pack k-  
101 point with spacing smaller than 0.04 Å<sup>-1</sup> to guarantee precision. All structures are  
102 geometrically relaxed until the total force on each ion was reduced below 0.01 eV Å<sup>-1</sup>.  
103 The bulk Gibbs free energy can be assessed with the consideration of the dictating  
104 phonon entropy for each phase[48]. Therefore, the Gibbs free energy change (ΔG)  
105 between products and reactants can be quantified as follows:

$$106 \quad \Delta G = (G_{products} - G_{reactants})/n,$$

107 where n is the number of atoms in products or reactants.

108

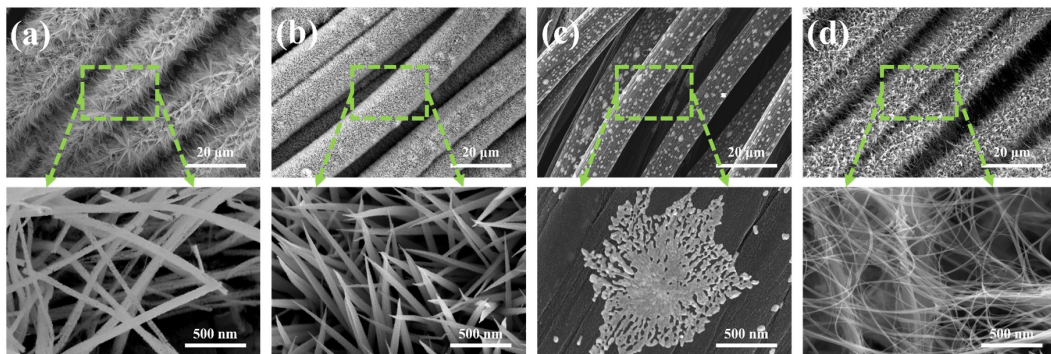

109

110 **Fig. S1.** SEM images of different bimetallic and monometallic oxides. (a) ZCO@CC,

111 (b) NCO@CC, (c) ZnO@CC, and (d) MnO<sub>2</sub>@CC.

112

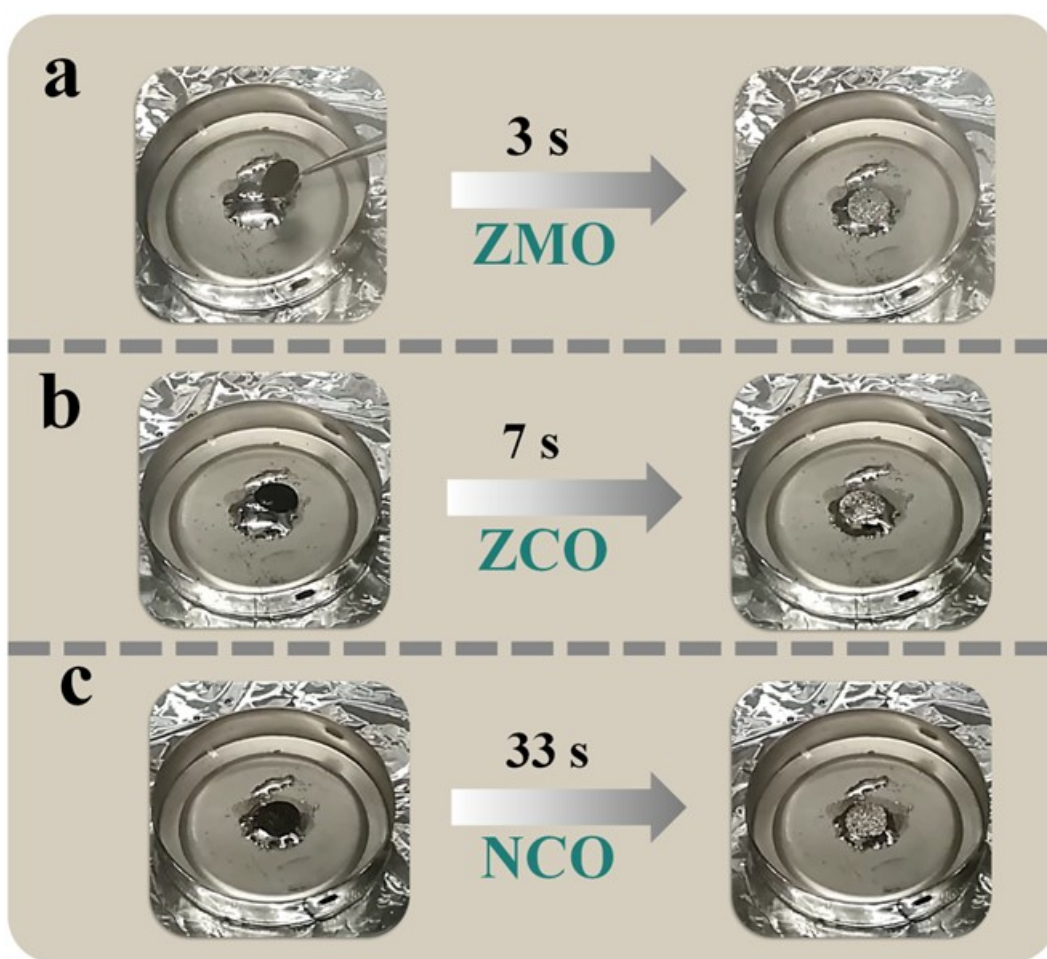

113

114 **Fig. S2.** Digital images of molten Li infusing processes. Time-lapse images for Li-metal

115 infusion of (a) ZMO@CC, (b) ZCO@CC, (c) NCO@CC.

116

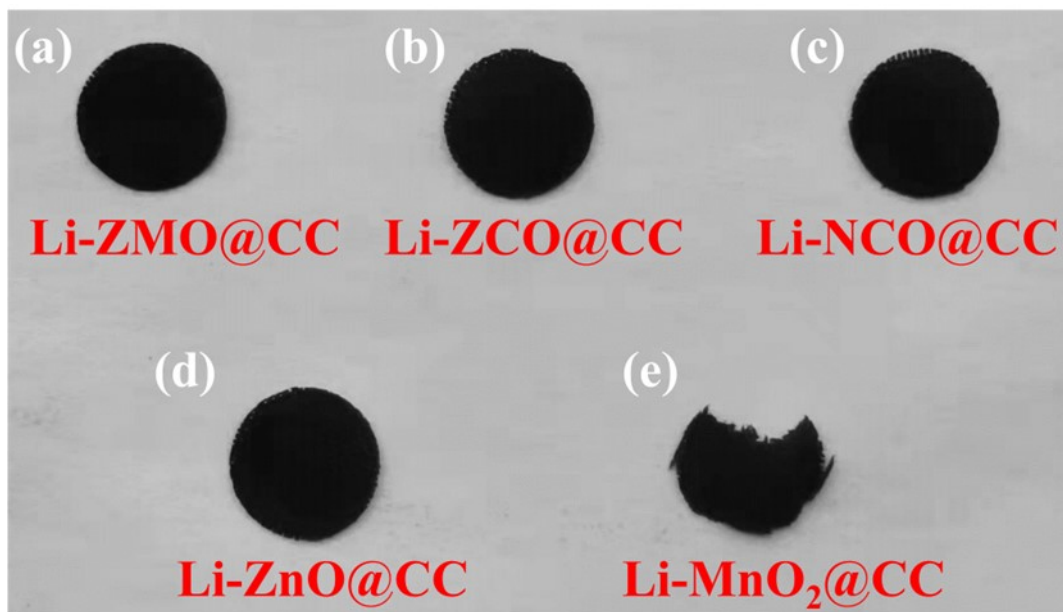

117

118 **Fig. S3.** Digital images of the composite Li anodes after removing Li metal. The digital  
 119 camera images of (a) Li-ZMO@CC, (b) Li-ZCO@CC, (c) Li-NCO@CC, (d) Li-  
 120 ZnO@CC, and (e) Li-MnO<sub>2</sub>@CC after removing Li via absolute ethyl alcohol.

121

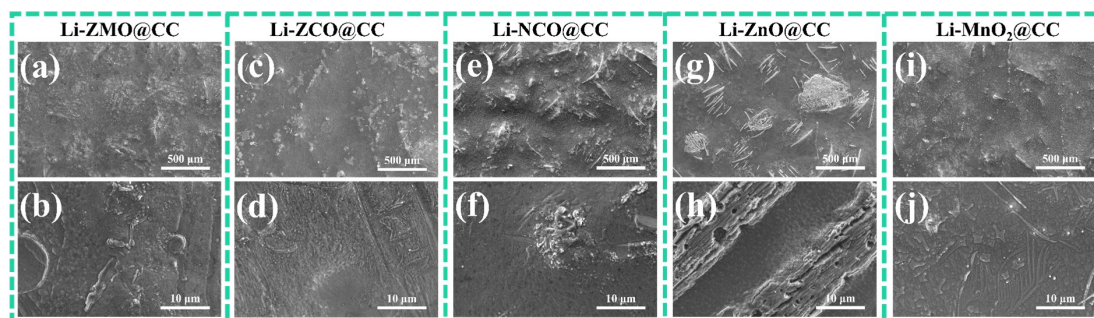

122

123 **Fig. S4.** Morphology characterizations of composite Li anodes. The SEM images of (a-  
 124 b) Li-ZMO@CC, (c-d) Li-ZCO@CC, (e-f) Li-NCO@CC, (g-h) Li-ZnO@CC, and (i-j)  
 125 Li-MnO<sub>2</sub>@CC.

126

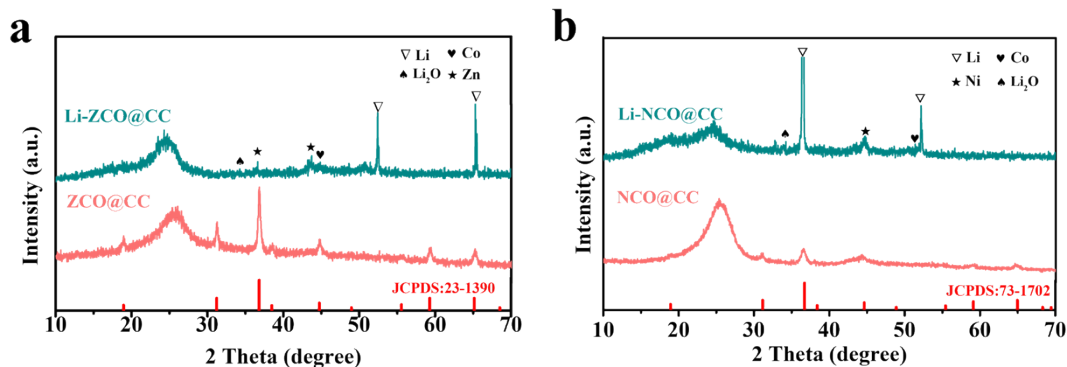

127  
 128 **Fig. S5.** Characterization of the electrodes before and after molten Li. The XRD  
 129 patterns of (a) ZCO@CC and Li-ZCO@CC, (b) NCO@CC and Li-NCO@CC,  
 130 respectively.

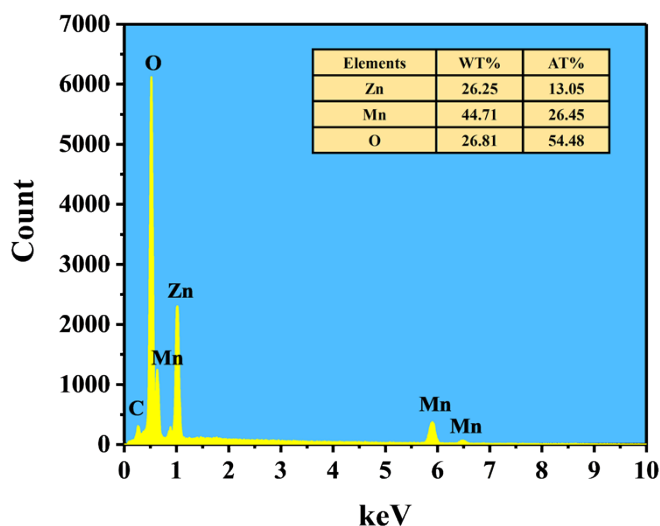

131  
 132 **Fig. S6.** EDX spectrum of ZMO@CC.

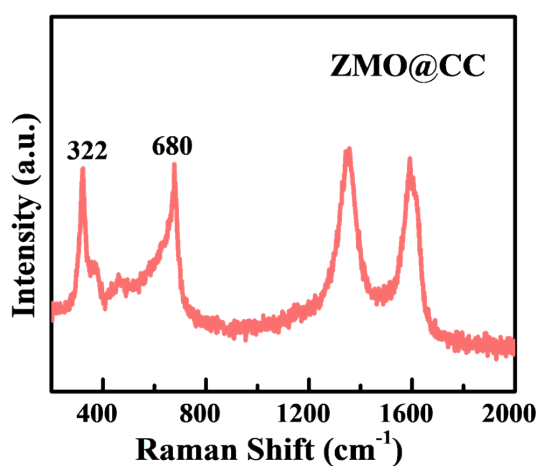

133  
 134 **Fig. S7.** Raman spectra of ZMO@CC.

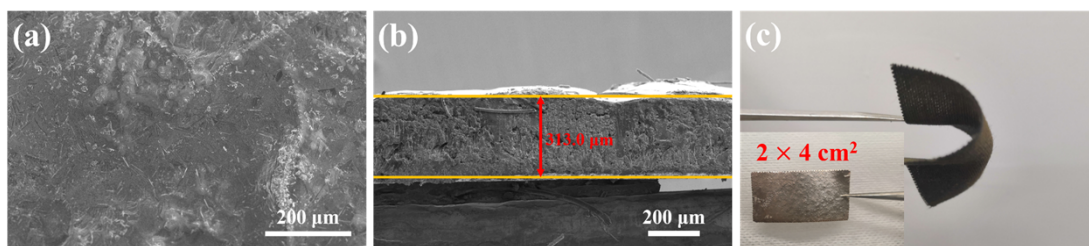

136  
137 **Fig. S8.** Morphology characterizations of Li-ZMO@CC. The (a) surface and (b)  
138 cross-sectional SEM images of Li-ZMO@CC. (c) Digital images of ZMO@CC and  
139 Li-ZMO@CC (the inset).

140

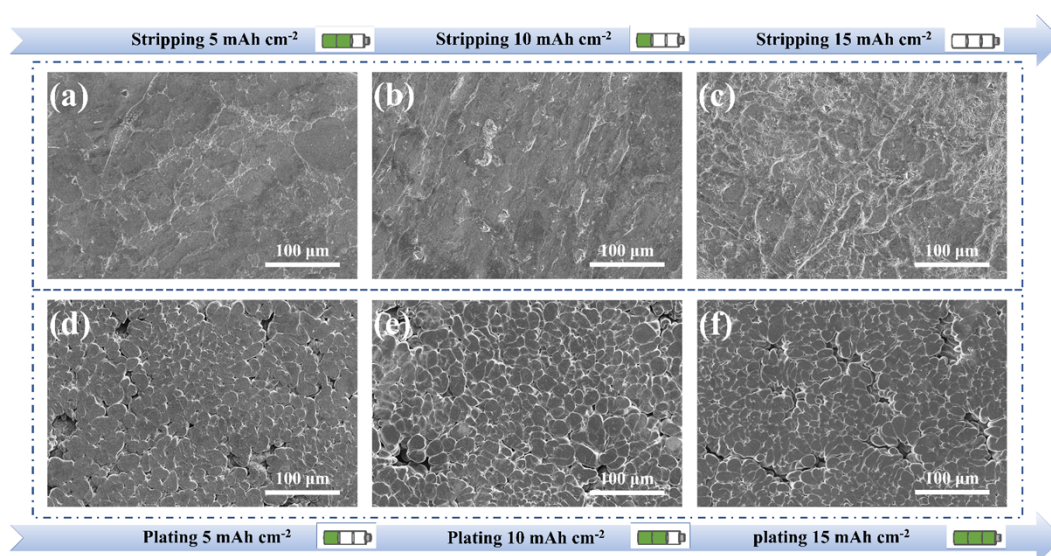

141  
142 **Fig. S9.** Morphology of Li foil during stripping/plating. The stripping capacity of (a) 5  
143 mAh cm<sup>-2</sup>, (b) 10 mAh cm<sup>-2</sup>, (c) 15 mAh cm<sup>-2</sup>, and then replating capacity of (d) 5 mAh  
144 cm<sup>-2</sup>, (e) 10 mAh cm<sup>-2</sup>, and (f) 15 mAh cm<sup>-2</sup> at a current density of 1 mA cm<sup>-2</sup>.

145

146

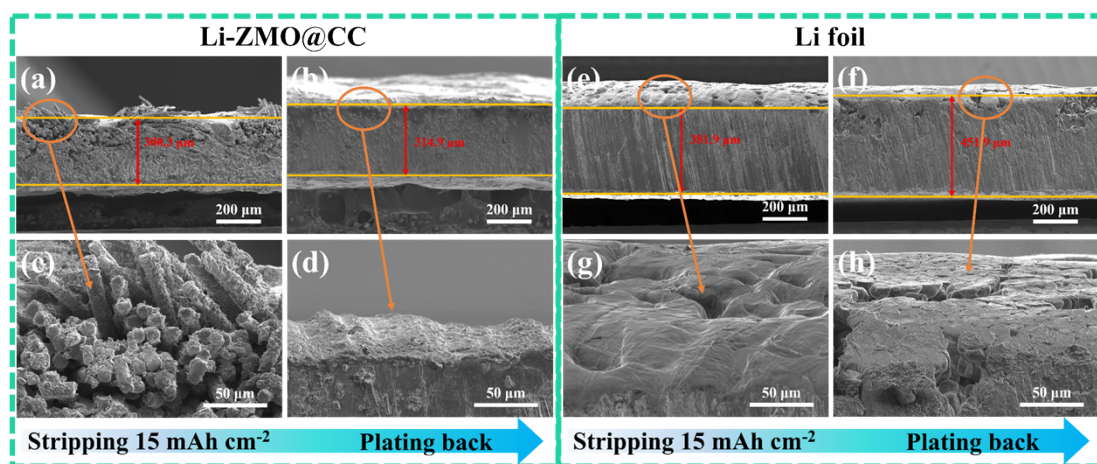

147

148 **Fig. S10.** Morphology evolution of Li-ZMO@CC and Li foil under different Li  
 149 stripping/plating capacities. Cross-sectional SEM images of the Li-ZMO@CC after (a,  
 150 c) stripping  $15 \text{ mAh cm}^{-2}$  Li and then (b, d) plating back  $15 \text{ mAh cm}^{-2}$  Li, Li foil after  
 151 (e, g) stripping  $15 \text{ mAh cm}^{-2}$  Li and then (f, h) plating back  $15 \text{ mAh cm}^{-2}$  Li.

152

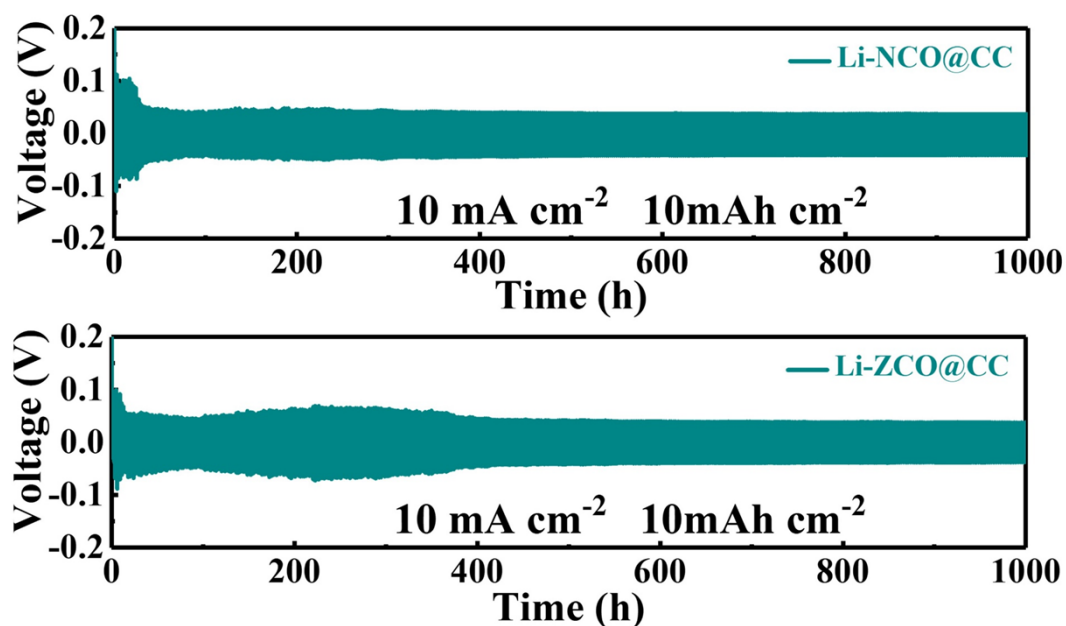

153

154 **Fig. S11.** Voltage profiles of Li-NCO@CC, Li-ZCO@CC anodes at  $10 \text{ mA cm}^{-2}/10$   
 155  $\text{mAh cm}^{-2}$ .

156

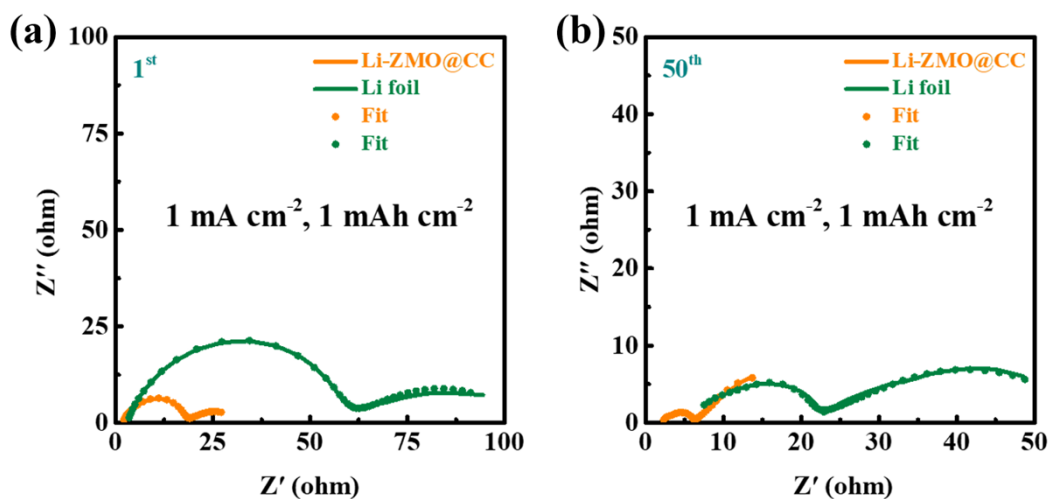

157

158 **Fig. S12.** Electrochemical impedance spectroscopy (EIS) of composite Li anodes. EIS  
159 spectrum of Li-ZMO@CC and Li foil anodes after different cycles (b-c) at  $1 \text{ mA cm}^{-2}$   
160  $2/1 \text{ mAh cm}^{-2}$ .

161

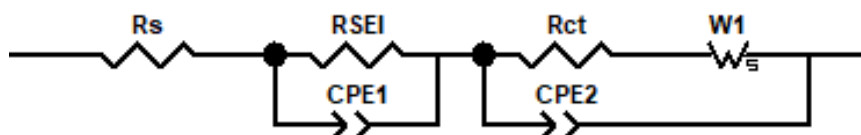

162

163 **Fig. S13.** The equivalent circuit of EIS.

164

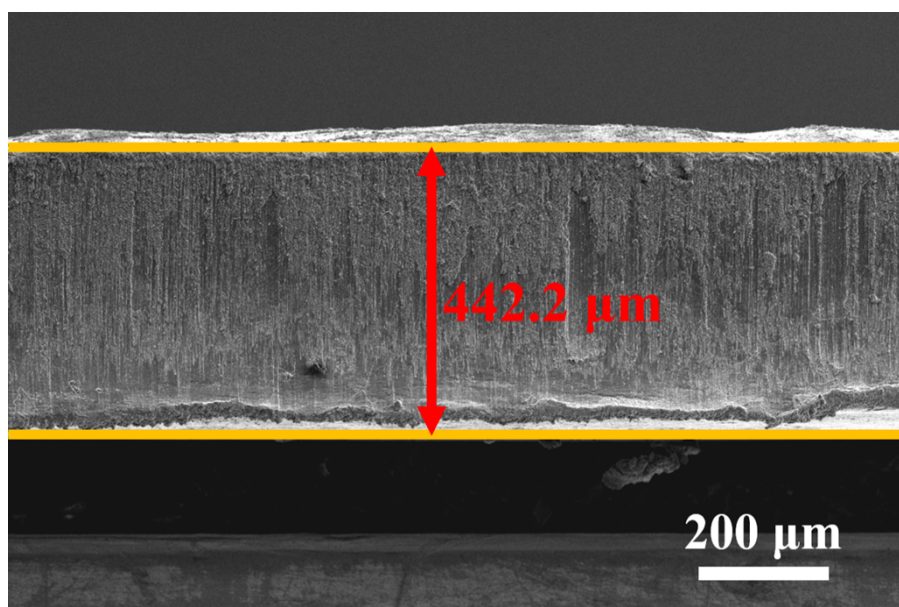

165

166 **Fig. S14.** The cross-sectional SEM image of Li foil at initial stage.

167

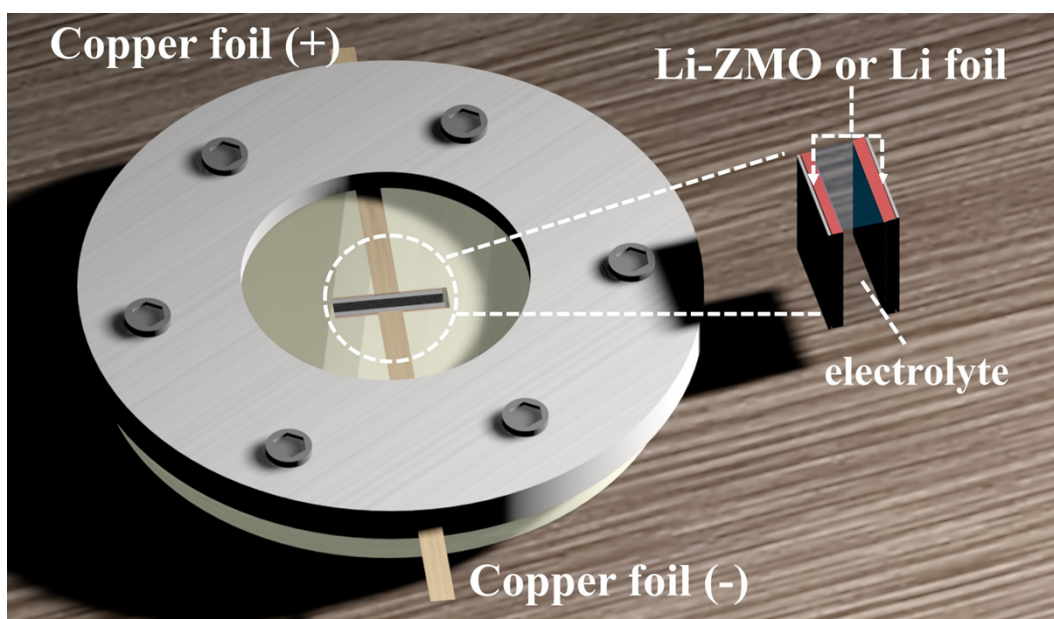

168

169 **Fig. S15.** The schematic diagram of electrochemical pool.

170

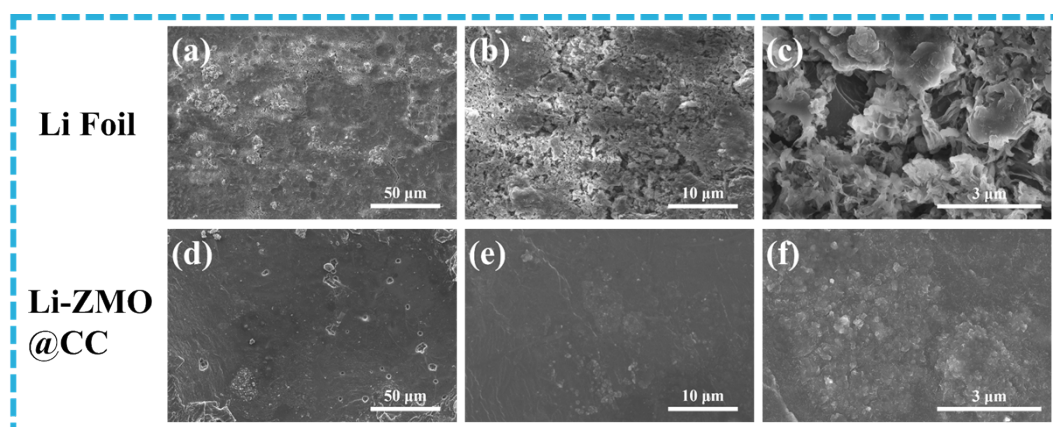

171

172 **Fig. S16.** Morphology evolution of full cells. The top-view SEM images of (a-c) Li|LFP  
 173 and (d-f) Li-ZMO@CC|LFP anodes after 50<sup>th</sup> cycles at 2 C.

174

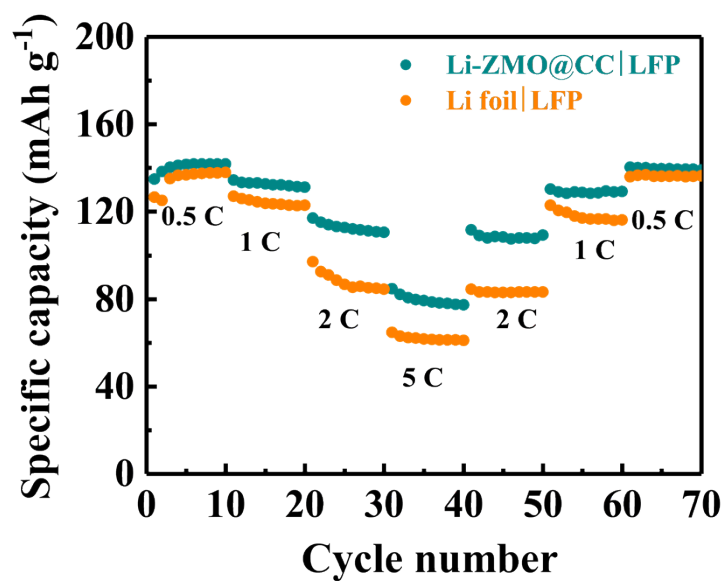

175

176 **Fig. S17.** Rate performance of Li-ZMO@CC|LFP and Li|LFP cells in the rate ranges  
177 from 0.5 to 5 C.

178

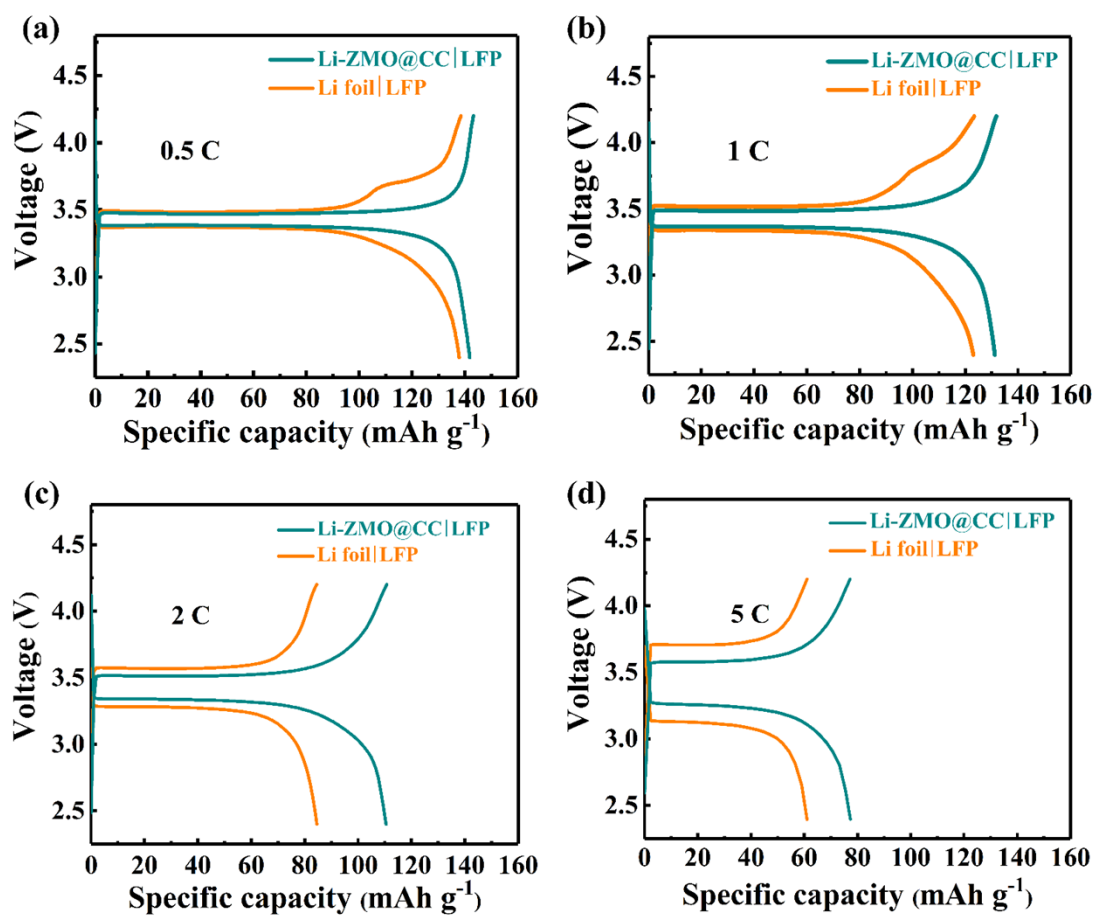

179

180 **Fig. S18.** Voltage hysteresis of full cells. Voltage profiles of Li-ZMO@CC|LFP and  
181 Li|LFP cells cycled at (a) 0.5, (b) 1, (c) 2, and (d) 5 C.

182

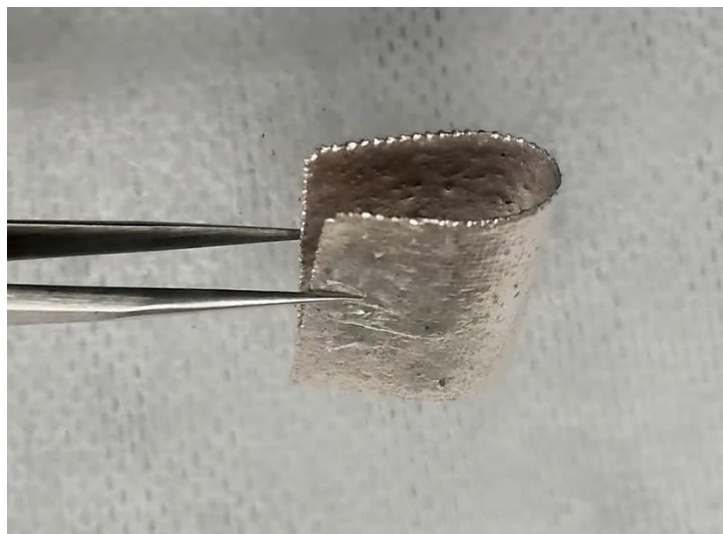

183

184 **Fig. S19.** The digital images in Li-ZMO@CC electrode under bending state.

185

186 **Supplementary Table**

187 **Table S1.** The calculated Gibbs free energy change of the reactions between bimetallic/  
 188 monometallic oxides and molten Li.

189

| Materials                              | Gibbs Free Energy Change (300 °C) |
|----------------------------------------|-----------------------------------|
| ZnMn <sub>2</sub> O <sub>4</sub> (ZMO) | -66.22 KJ/mol                     |
| ZnCo <sub>2</sub> O <sub>4</sub> (ZMO) | -81.2 KJ/mol                      |
| NiCo <sub>2</sub> O <sub>4</sub> (NCO) | -99.9 KJ/mol                      |
| ZnO                                    | -111.35 KJ/mol                    |
| Mn <sub>2</sub> O                      | -75.84 KJ/mol                     |

190

191

**Table S2.** The cycle performances comparison of Li-ZMO@CC anode with previously reported Li metal anodes under various current densities and capacities.

194

| Electrode              | Current density<br>(mA cm <sup>-2</sup> ) | Areal capacity<br>(mAh cm <sup>-2</sup> ) | Time (h)    |
|------------------------|-------------------------------------------|-------------------------------------------|-------------|
| <b>This work</b>       | <b>5</b>                                  | <b>10</b>                                 | <b>1200</b> |
|                        | <b>5</b>                                  | <b>20</b>                                 | <b>500</b>  |
|                        | <b>10</b>                                 | <b>10</b>                                 | <b>1900</b> |
| <b>Li-NCH@CF[1]</b>    | <b>3</b>                                  | <b>3</b>                                  | <b>500</b>  |
| <b>rGO-Ag-S-CNT[2]</b> | <b>2</b>                                  | <b>1</b>                                  | <b>500</b>  |
| <b>Ag@CMFs-Li[3]</b>   | <b>10</b>                                 | <b>2</b>                                  | <b>300</b>  |
| <b>CNT/NiO@Li[4]</b>   | <b>3</b>                                  | <b>3</b>                                  | <b>900</b>  |
| <b>ZnO-MCNCf[5]</b>    | <b>10</b>                                 | <b>10</b>                                 | <b>1400</b> |
| <b>Cu@MC@Li[6]</b>     | <b>3</b>                                  | <b>1</b>                                  | <b>150</b>  |
| <b>Li-Mn/G foam[7]</b> | <b>2</b>                                  | <b>1</b>                                  | <b>300</b>  |
| <b>Cu@AuGA-Li[8]</b>   | <b>4</b>                                  | <b>4</b>                                  | <b>1200</b> |

195

196

197 **Table S3.** The equivalent circuit fitting results of EIS measurements for Li foil and Li-  
 198 ZMO@CC anodes.

199

| Anode            | Li foil       |                   |                  | Li-ZMO@CC     |                   |                  |
|------------------|---------------|-------------------|------------------|---------------|-------------------|------------------|
|                  | $R_s(\Omega)$ | $R_{SEI}(\Omega)$ | $R_{ct}(\Omega)$ | $R_s(\Omega)$ | $R_{SEI}(\Omega)$ | $R_{ct}(\Omega)$ |
| 1 <sup>st</sup>  | 3.191         | 51.24             | 1.729            | 1.873         | 4.262             | 11.03            |
| 50 <sup>th</sup> | 5.743         | 8.479             | 6.019            | 2.076         | 1.816             | 2.206            |

200

201

## 202   **References**

- 203 [1] C. Chen, J. Guan, N.W. Li, Y. Lu, D. Luan, C.H. Zhang, G. Cheng, L. Yu, X.W.  
204 Lou, Lotus-Root-Like Carbon Fibers Embedded with Ni–Co Nanoparticles for  
205 Dendrite-Free Lithium Metal Anodes, *Advanced Materials*, (2021) 2100608.
- 206 [2] X.L. Li, S. Huang, D. Yan, J. Zhang, D. Fang, Y. Von Lim, Y. Wang, T.C. Li, L.  
207 Yifan, L. Guo, Tuning lithiophilicity and stability of 3D conductive scaffold via  
208 covalent Ag-S bond for high-performance lithium metal anode, *Energy &*  
209 *Environmental Materials*.
- 210 [3] Y. Fang, S.L. Zhang, Z.-P. Wu, D. Luan, X.W.D. Lou, A highly stable lithium metal  
211 anode enabled by Ag nanoparticle–embedded nitrogen-doped carbon macroporous  
212 fibers, *Science Advances*, 7 (2021) eabg3626.
- 213 [4] Y. Mei, J. Zhou, Y. Hao, X. Hu, J. Lin, Y. Huang, L. Li, C. Feng, F. Wu, R. Chen,  
214 High-Lithiophilicity Host with Micro/Nanostructured Active Sites based on Wenzel  
215 Wetting Model for Dendrite-Free Lithium Metal Anodes, *Advanced Functional*  
216 *Materials*, (2021) 2106676.
- 217 [5] R. Zhang, Y. Li, L. Qiao, D. Li, J. Deng, J. Zhou, L. Xie, Y. Hou, T. Wang, W.  
218 Tian, Atomic layer deposition assisted superassembly of ultrathin ZnO layer decorated  
219 hierarchical Cu foam for stable lithium metal anode, *Energy Storage Materials*, 37  
220 (2021) 123-134.
- 221 [6] J. Qian, S. Wang, Y. Li, M. Zhang, F. Wang, Y. Zhao, Q. Sun, L. Li, F. Wu, R.  
222 Chen, Lithium Induced Nano-Sized Copper with Exposed Lithiophilic Surfaces to  
223 Achieve Dense Lithium Deposition for Lithium Metal Anode, *Advanced Functional*  
224 *Materials*, 31 (2021) 2006950.
- 225 [7] B. Yu, T. Tao, S. Mateti, S. Lu, Y. Chen, Nanoflake arrays of lithiophilic metal  
226 oxides for the ultra-stable anodes of lithium-metal batteries, *Advanced Functional*  
227 *Materials*, 28 (2018) 1803023.
- 228 [8] T. Yang, L. Li, F. Wu, R. Chen, A Soft Lithiophilic Graphene Aerogel for Stable  
229 Lithium Metal Anode, *Advanced Functional Materials*, 30 (2020) 2002013.

230
